# Supplementary material for: Structural Dynamics and Activity of B19V VP1u during the pHs of Cell Entry and Endosomal Trafficking
Source: MDPI journal article supplement (doi:10.3390/v14091922), 2022-08-30
Supplement: s1 [file s1]

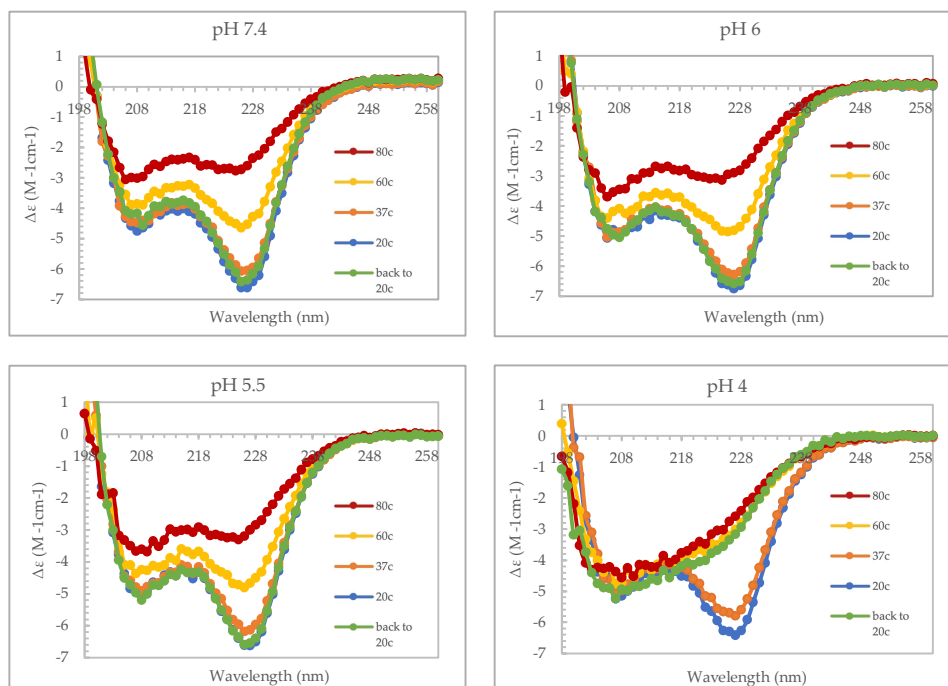

Supplementary Figure S1. Effect of heat on the secondary structure of the RBD. CD spectrum was recorded at pHs 4, 5.5, 6.0 and 7.4.
